# Supplementary material
Source: publisher site journal article supplement (https://vcs.pensoft.net/article/65469/download/suppl/37/)

Supplementary material to the paper Wells AF et al. Vegetation classification for northwestern Arctic Alaska using an EcoVeg approach: tussock tundra and low and tall willow groups and alliances. Vegetation Classification and Survey. DOI: 10.3897/VCS.65469

**Supplementary material 7. Toposequence diagram illustrating the landscape relationships for a river bar to inland dune sequence, North Slope, Alaska.**



Supplementary Material 7. Toposequence diagram illustrating the landscape relationships for a river bar to inland dune sequence, North Slope, Alaska.

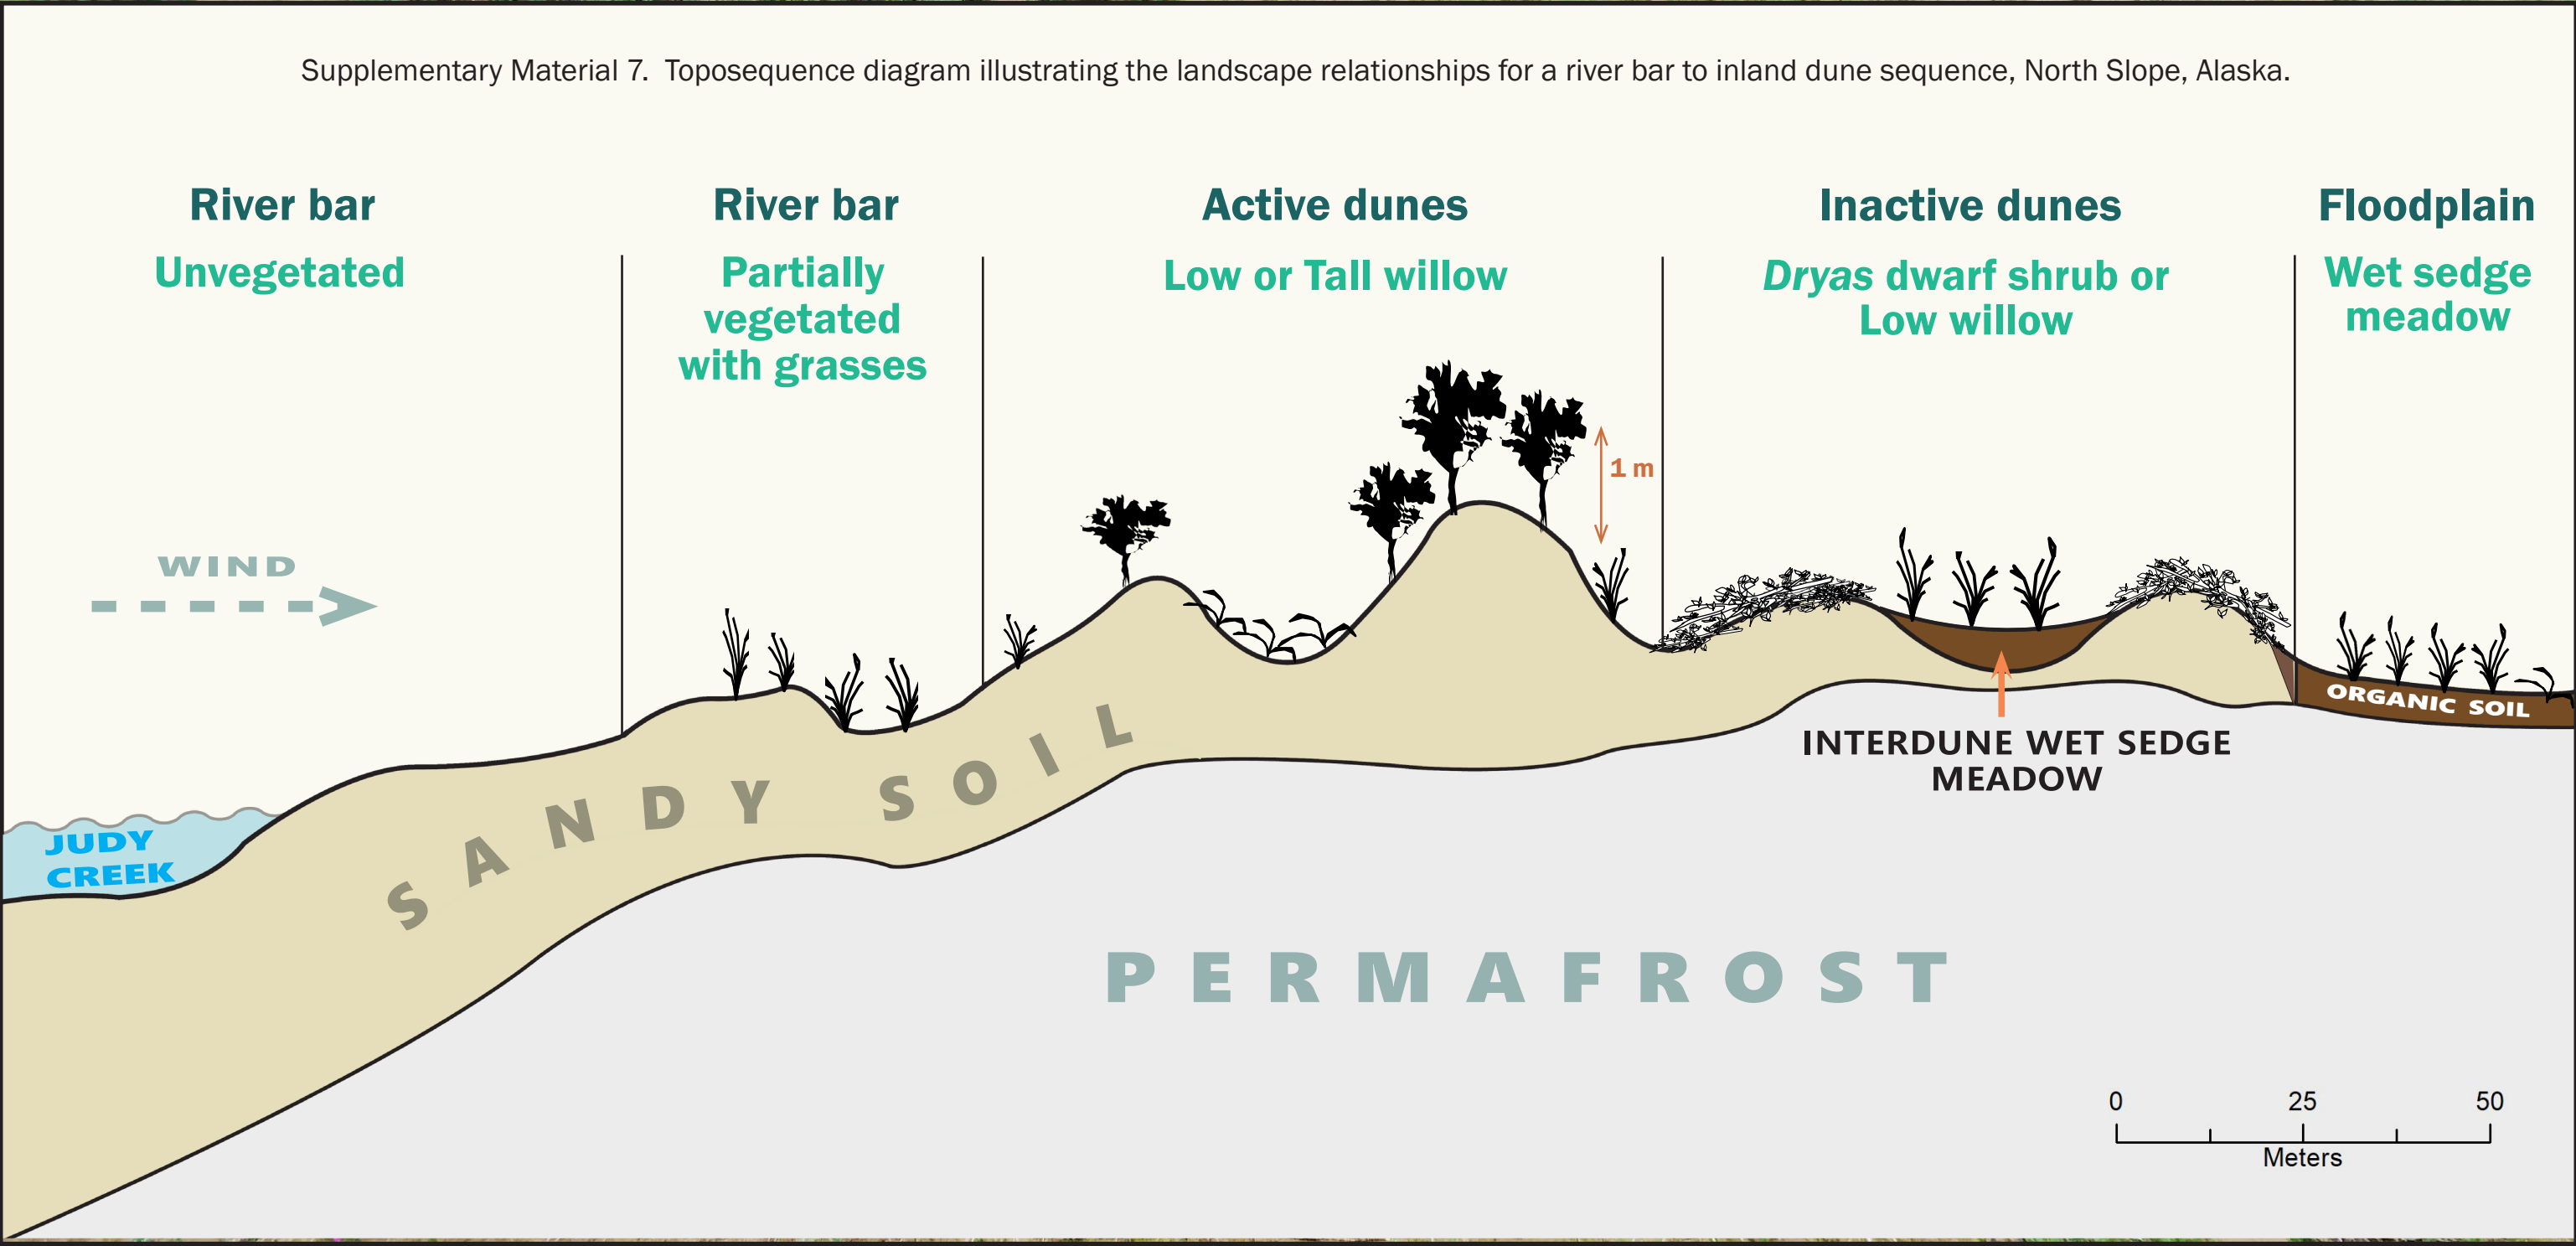

Supplement: Supplementary file 1
